# Supplementary material for: Convergent Evolution of Calcineurin Pathway Roles in Thermotolerance and Virulence in Candida glabrata
Source: PubMed Central journal article supplement (PMC3362297; doi:10.1534/g3.112.002279), 2012-06-01
Supplement: supp_2.6.675_002279SI.pdf [file supp_2.6.675_002279SI.pdf]

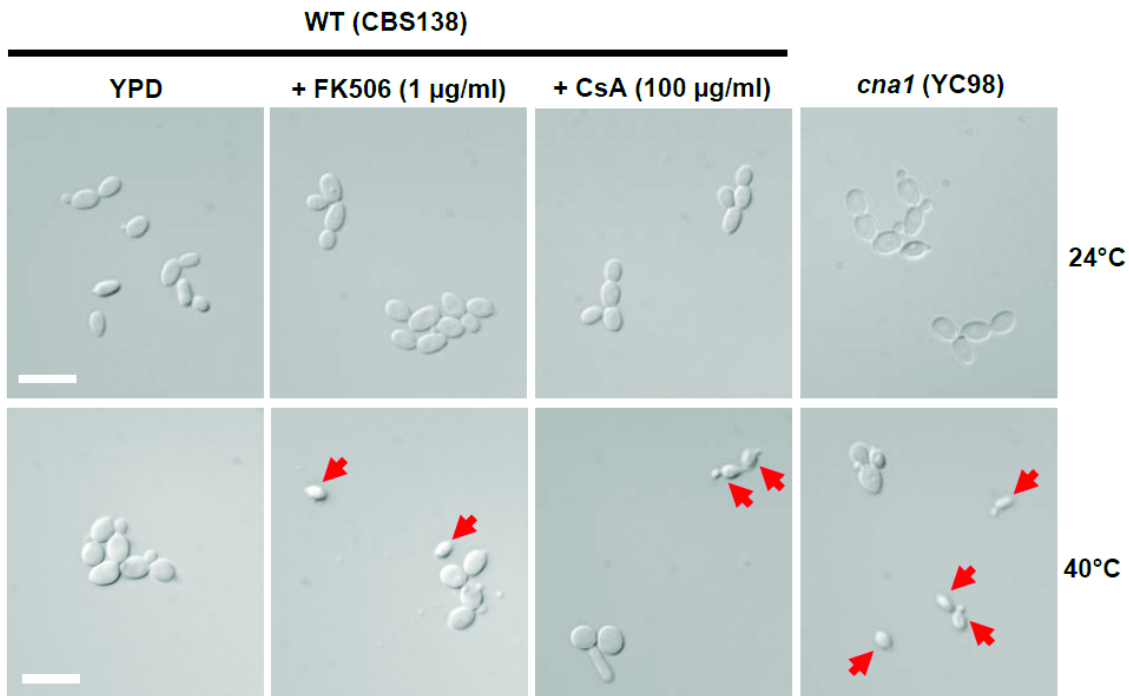

**Figure S1** *C. glabrata* wild-type cells exhibit a shrunken cell morphology at 40°C in the presence of FK506 or CsA. Cells were grown overnight in YPD medium at 24°C, washed twice with dH<sub>2</sub>O, diluted to 0.5 OD<sub>600</sub>/ml in fresh liquid YPD medium in the presence or absence of FK506 (1  $\mu\text{g/ml}$ ) or CsA (100  $\mu\text{g/ml}$ ), and incubated at 24°C or 40°C with shaking at 250 rpm for 4 h. The *cna1* mutant strain was served as the control. The shrunken cells (marked with arrowheads) were only found at high temperature (40°C), but not at 24°C. The percentage of shrunken cells at 40°C in wild-type, FK506-treated wild-type, CsA-treated wild-type, and *cna1* mutant are 3.1  $\pm$  1.4% (mean  $\pm$  standard deviation; from three independent experiments), 27.1  $\pm$  8.3%, 23.4  $\pm$  9.3%, and 42  $\pm$  11.3%, respectively. The images were taken at 100X. Scale bar = 10  $\mu\text{m}$ .

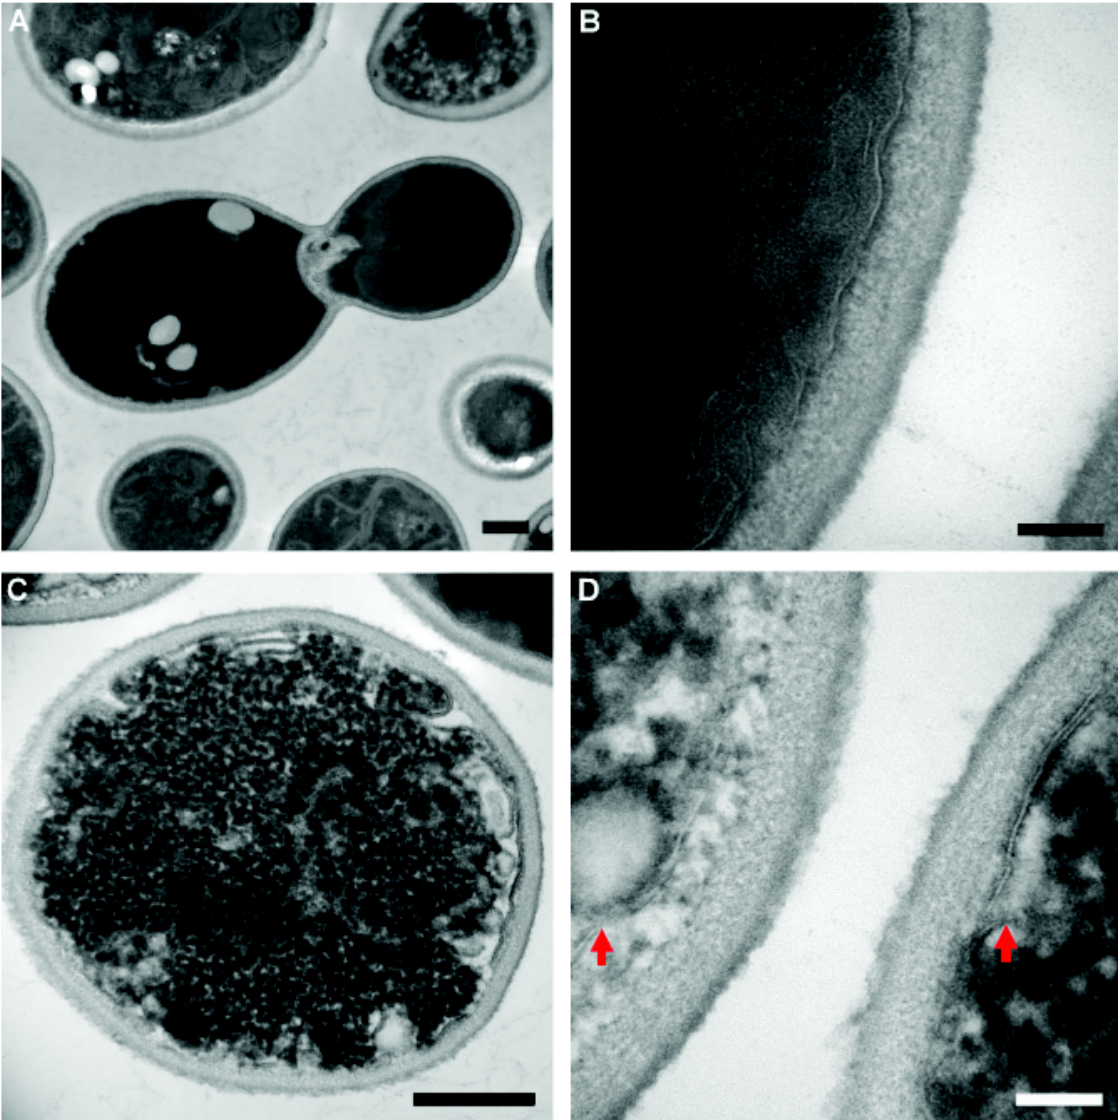

**Figure S2** TEM images of *C. glabrata* wild type (CBS138) and *crz1* mutant (YC182) cells grown at 40°C. *C. glabrata cna1* and *cnb1* could not be recovered from growth at 40°C for TEM analysis. Wild-type cells (**A, B**) display normal morphology and budding but *crz1* mutants (**C, D**) display aberrant cell membrane and morphology in comparison to wild-type cells. Scale bar = 500 nm (**A, C**) and 100 nm (**B, D**). First and second columns represent a global image of the cell and a higher magnification view of the cell membrane, respectively.

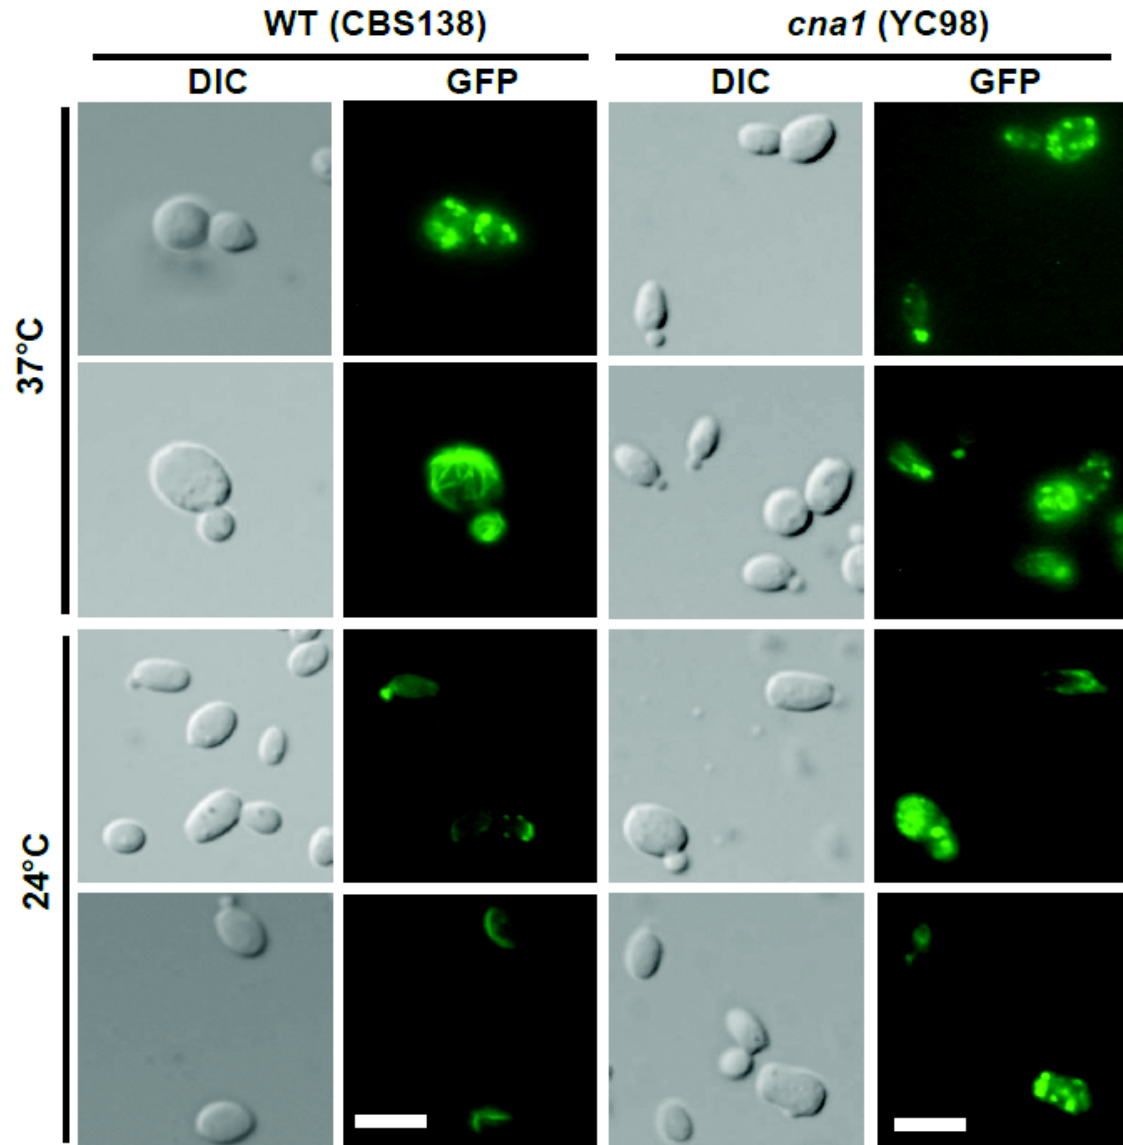

**Figure S3** *C. glabrata* wild type and calcineurin mutant cells exhibit normal cortical actin patch structures. The incubation and staining of cells with Alexa fluor® 488 phalloidin are described in material and methods. The images were taken at 100X. Scale bar = 5  $\mu$ m.

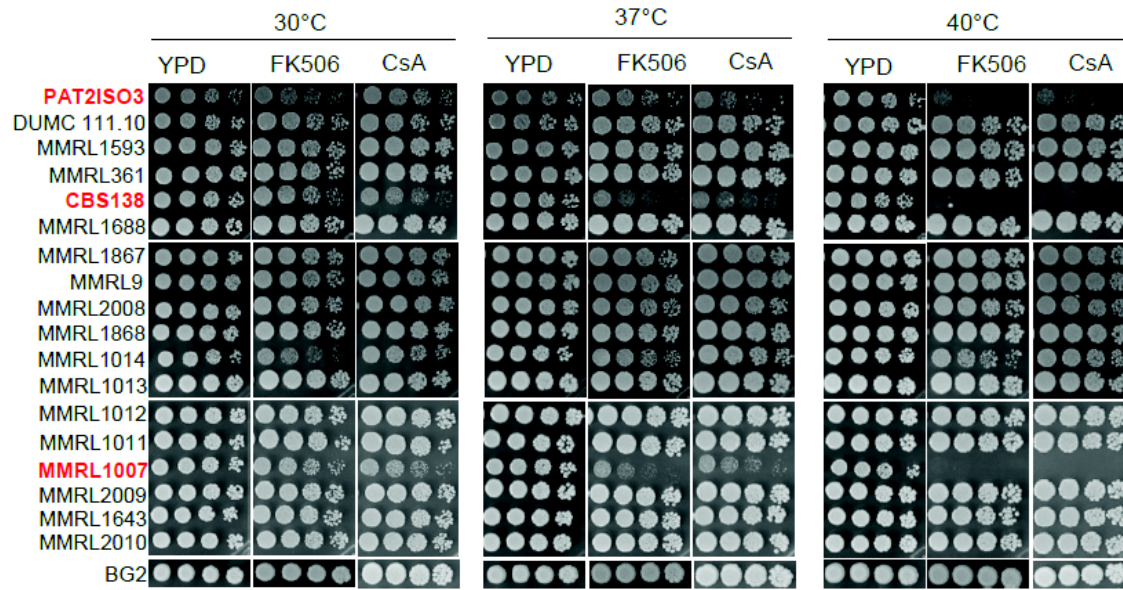

**Figure S4** Some *C. glabrata* clinical isolates exhibit temperature-sensitive growth when exposed to calcineurin inhibitors. Cells were grown overnight in YPD at 30°C, 5-fold serially diluted, and spotted onto YPD medium containing FK506 (1 µg/ml) or cyclosporin A (CsA; 100 µg/ml). Cultures were incubated at the indicated temperatures for 48 h. *C. glabrata* strains that are hypersensitive to calcineurin inhibitors at high temperature are indicated in dark red.

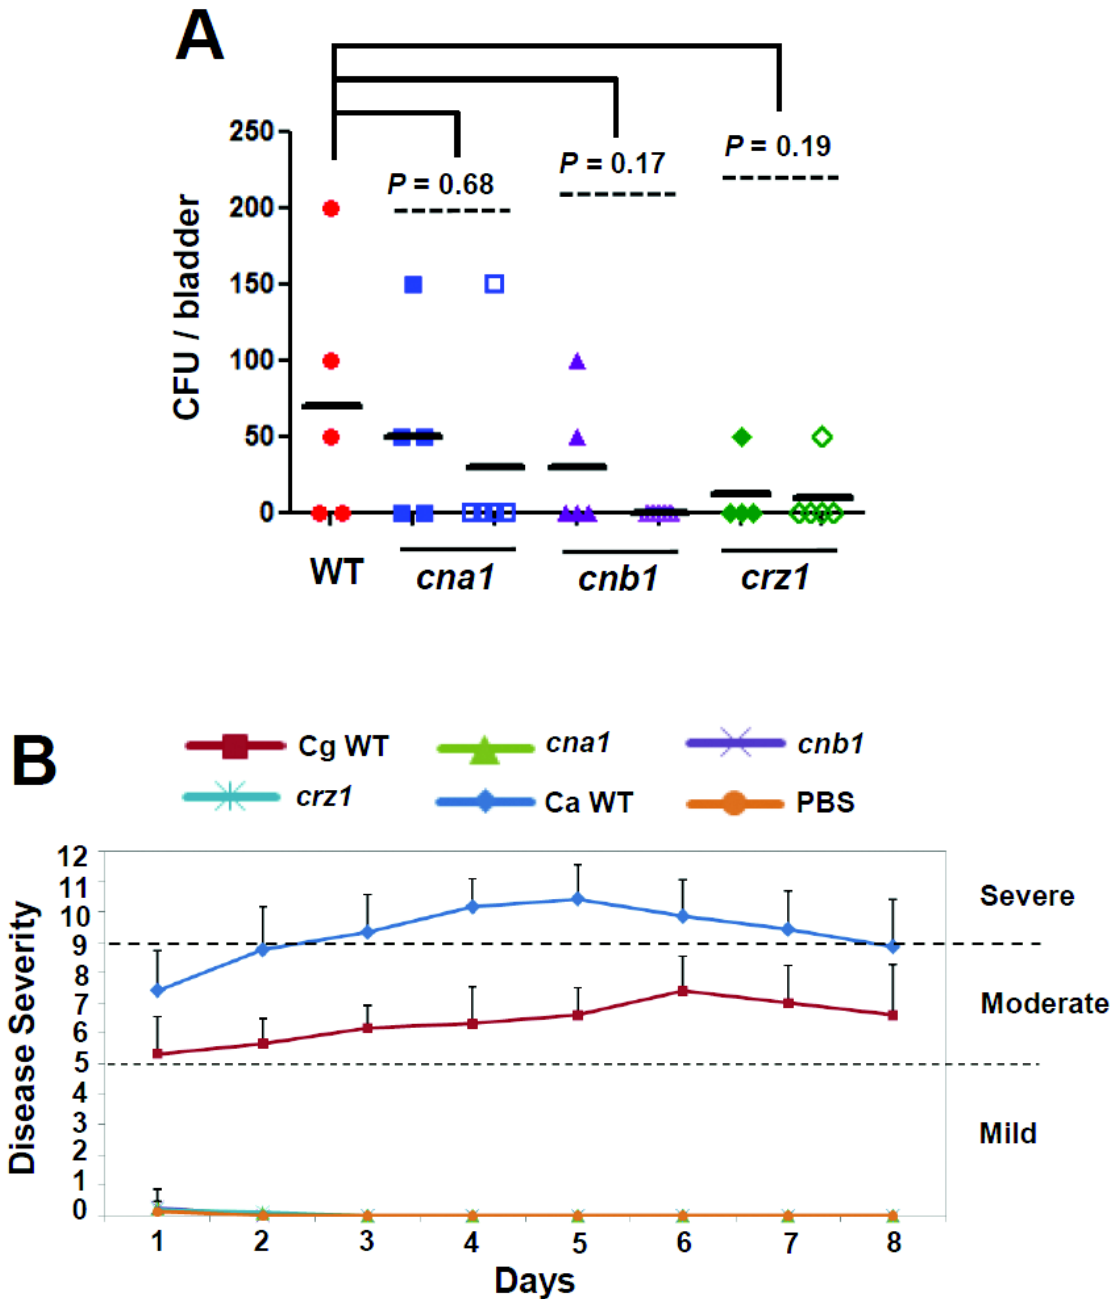

**Figure S5** Virulence of *C. glabrata* calcineurin and *crz1* mutants in murine urinary tract and ocular infection models. **(A)** The fungal burden in the bladders was determined at day 7 after challenging mice with  $3 \times 10^7$  cells via urinary tract infection. Five female C3H/HeJ mice were inoculated per strain (except one *crz1* mutant with 4 mice due to the death of one mouse following anesthesia treatment). The *P* value between wild-type (WT) and mutants is shown. **(B)** Disease severity was scored for 8 days. *C. albicans* SC5314 and the PBS mock inoculation served as reference controls. Mice infected with *C. glabrata* *cna1*, *cnb1*, or *crz1* mutants, or the PBS control, exhibited normal corneas, and score curves essentially overlapped. Mice infected with wild-type *C. glabrata* CBS138 and *C. albicans* SC5314 strains exhibiting visible signs of keratitis were plotted.



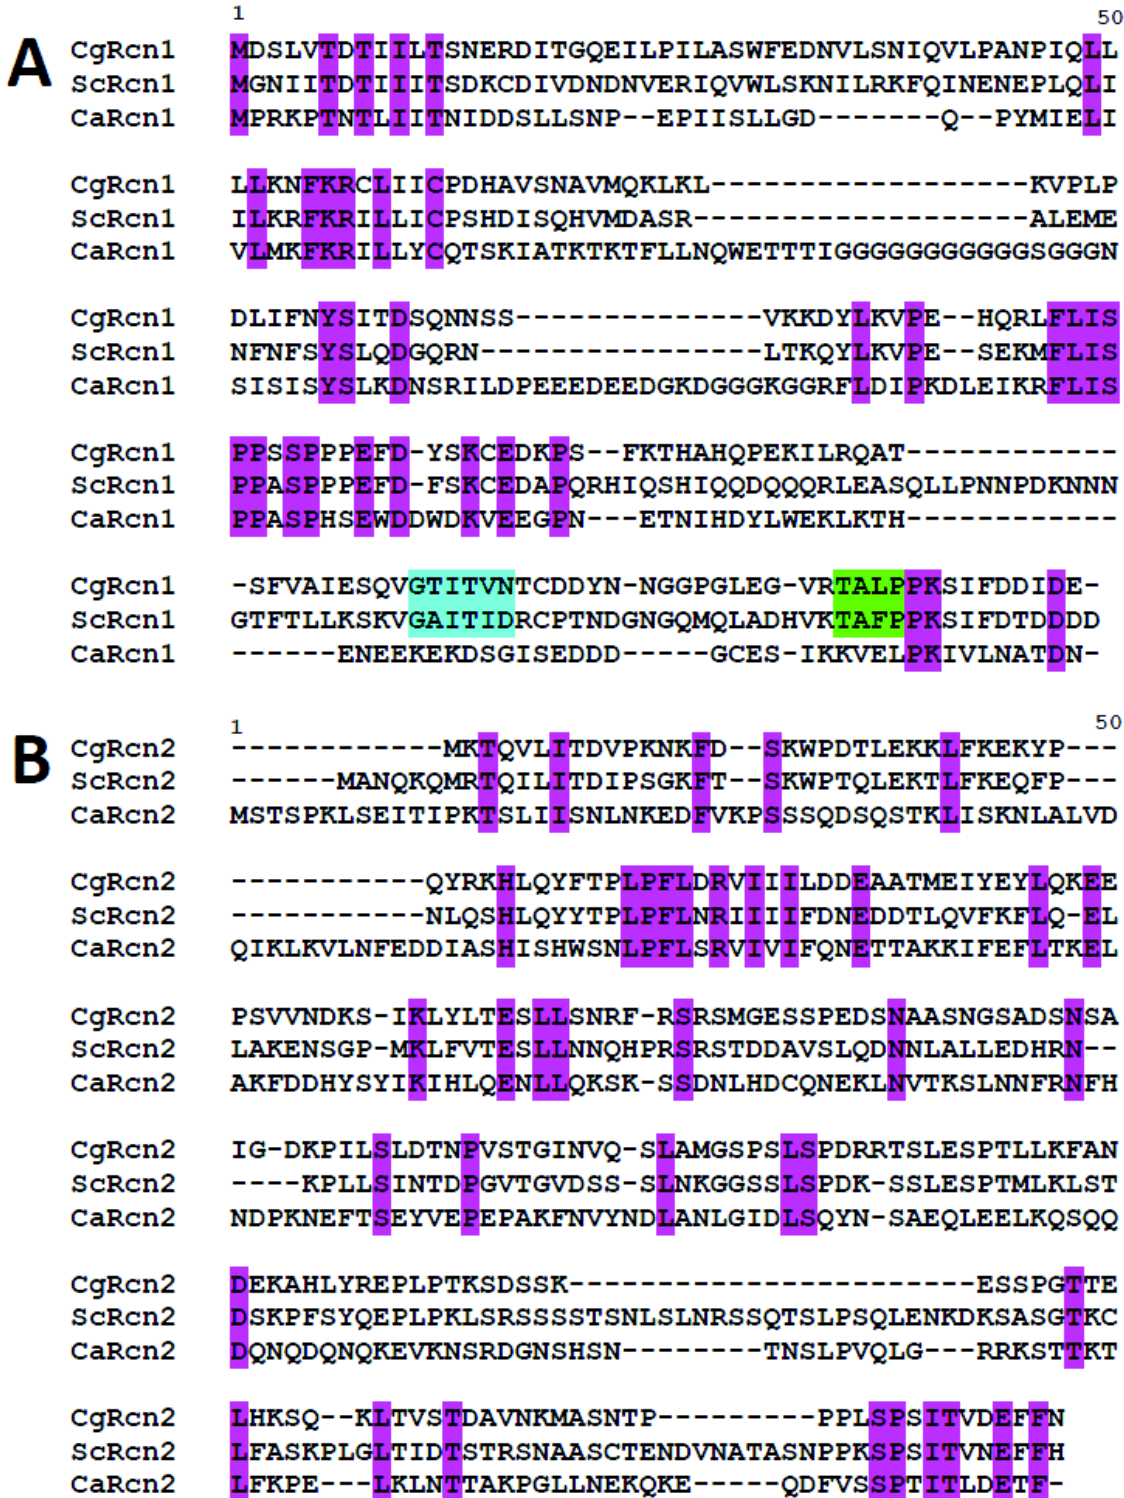

**Figure S6** Pairwise alignment of calcineurin regulators from *C. glabrata*, *S. cerevisiae*, and *C. albicans*. Multiple sequence alignments are depicted using ClustalW software ([http://npsa-pbil.ibcp.fr/cgi-bin/npsa\\_automat.pl?page=npsa\\_clustalw.html](http://npsa-pbil.ibcp.fr/cgi-bin/npsa_automat.pl?page=npsa_clustalw.html)). The conserved amino acids and TxxP motif are purple- and green-shaded, respectively. The PxlIT-like motif [P/G]x[I/V]x[I/V/L][E/D/N/H/T] is blue-shaded in panel A (depicting Rcn1 alignments), and underlined in panel B (depicting Rcn2 alignments).

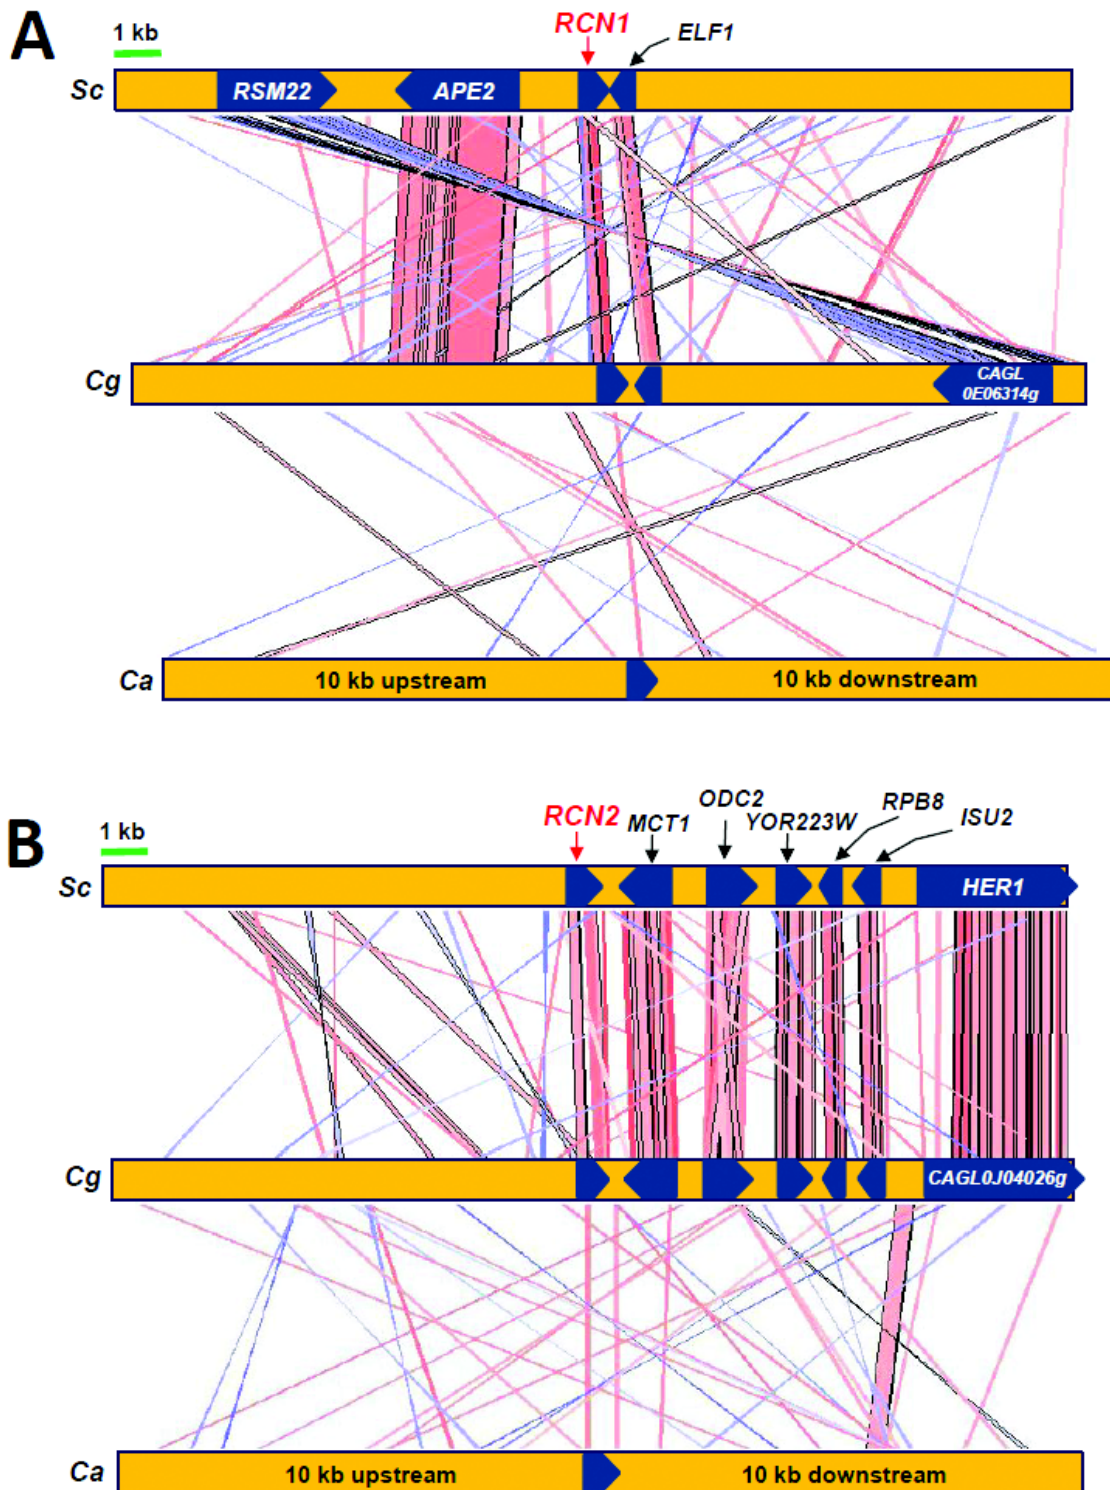

**Figure S7** Synteny analysis of Rcn1 and Rcn2. NCBI tBLASTx (Altschul *et al.*, 1997) and Artemis programs (Carver *et al.*, 2008) were used to conduct synteny analysis. Red and blue blocks (lines) represent forward and reverse matches of the DNA sequence (tBLASTx based) among *S. cerevisiae* (Sc), *C. glabrata* (Cg), and *C. albicans* (Ca).

## REFERENCES

- Altschul, S.F., Madden, T.L., Schaffer, A.A., Zhang, J., Zhang, Z., Miller, W., and Lipman, D.J. (1997) Gapped BLAST and PSI-BLAST: a new generation of protein database search programs. *Nucleic Acids Res* **25**: 3389-3402.
- Carver, T., Berriman, M., Tivey, A., Patel, C., Bohme, U., Barrell, B.G., Parkhill, J., and Rajandream, M.A. (2008) Artemis and ACT: viewing, annotating and comparing sequences stored in a relational database. *Bioinformatics* **24**: 2672-2676.



**Table S1 PCR primers**

| Primer | Use                     | Sequence (5' → 3')                                |
|--------|-------------------------|---------------------------------------------------|
| JC17   | <i>SAT1</i> flipper     | GGCCCCCCTCGAGGAAGTT                               |
| JC18   | <i>SAT1</i> flipper     | GCTCTAGAACTAGTGGATCT                              |
| JC49   | 5'NCR of <i>CNA1</i>    | ACACATTATGCAACATCAA                               |
| JC50   | 5'NCR of <i>CNA1</i>    | <u>AACTTCCTCGAGGGGGGGCCATTGTGCGGTGCCAACAAAGAA</u> |
| JC51   | 3'NCR of <i>CNA1</i>    | <u>AGATCCACTAGTTCTAGAGCTTTCATCTCAAGAGCAAAA</u>    |
| JC52   | 3'NCR of <i>CNA1</i>    | TTGAACGTTACTGGGGTTGA                              |
| JC55   | <i>CNA1</i> ORF         | AAGACAGACGCAGAGCTGAAT                             |
| JC56   | <i>CNA1</i> ORF         | GACATTCGTTTTTAAAAGTGA                             |
| JC48   | Disruption confirmation | ACAATCAAAGGTGGTCCT                                |
| JC81   | Disruption confirmation | AACTTCCTCGAGGGGGGGCC                              |
| JC122  | Disruption confirmation | CACACTTTATTGTTGTCGCC                              |
| JC134  | 5'NCR of <i>CNB1</i>    | ACACCATAAAAAGTCCCAGCG                             |
| JC135  | 5'NCR of <i>CNB1</i>    | <u>AACTTCCTCGAGGGGGGGCCTCCCTTGATTAATACTTCTC</u>   |
| JC136  | 3'NCR of <i>CNB1</i>    | <u>AGATCCACTAGTTCTAGAGCGGCAAGAACTTAACGAGGA</u>    |
| JC137  | 3'NCR of <i>CNB1</i>    | TCAACTTCAACAGAGTAGCTC                             |
| JC138  | <i>CNB1</i> overlap     | CAAACGTTTTGTTGGATGGC                              |
| JC139  | <i>CNB1</i> overlap     | CAACACTTTCGGAGAGAGAT                              |
| JC140  | <i>CNB1</i> ORF         | ATGGGAGCTGCACCATCTAAA                             |
| JC141  | <i>CNB1</i> ORF         | TACTGAAGGGTCAGGCTCTTT                             |
| JC142  | 5'NCR of <i>CRZ1</i>    | TAAACCCATGGAGTGTGGAA                              |
| JC143  | 5'NCR of <i>CRZ1</i>    | <u>AACTTCCTCGAGGGGGGGCCGCTGAATATTGCAAATCTTG</u>   |
| JC144  | 3'NCR of <i>CRZ1</i>    | <u>AGATCCACTAGTTCTAGAGCCACAAACCTCCAGTATTTTT</u>   |
| JC145  | 3'NCR of <i>CRZ1</i>    | TCAAGTCTTAGAGATTCACCA                             |
| JC146  | <i>CRZ1</i> overlap     | TAATGAAAGCAATGCCAA                                |
| JC147  | <i>CRZ1</i> overlap     | GCAACAAATTTCTTGACTGGT                             |
| JC148  | <i>CRZ1</i> ORF         | TGGGCGATAACGAAGAGGATA                             |
| JC149  | <i>CRZ1</i> ORF         | CTCAAGTTATTTGAAGATGCA                             |
| JC441  | 5'NCR of <i>RCN2</i>    | CCGTCGGGCTTCTTTAAAT                               |
| JC442  | 5'NCR of <i>RCN2</i>    | <u>AACTTCCTCGAGGGGGGGCCTTGTGCTGCTATATCTGCGTG</u>  |
| JC443  | 3'NCR of <i>RCN2</i>    | <u>AGATCCACTAGTTCTAGAGCGGGGATTGCTTCTATGAAGCT</u>  |
| JC444  | 3'NCR of <i>RCN2</i>    | AAATTGCTCACGGAGTCACCT                             |
| JC445  | <i>RCN2</i> overlap     | CTCGGGATCATTGCTCAATA                              |
| JC446  | <i>RCN2</i> overlap     | AACGGGTCTAGTCGAGGACTT                             |
| JC453  | <i>RCN2</i> ORF         | AAAGGATCCATGAAGACACAGGTATTGA                      |
| JC454  | <i>RCN2</i> ORF         | AAAGGGCCCCTAGTTAAAGAACTCATCGAC                    |
| JC459  | 5'NCR of <i>RCN1</i>    | CGAGTGTTTATTATTCGGG                               |
| JC460  | 5'NCR of <i>RCN1</i>    | <u>AACTTCCTCGAGGGGGGGCCTCCGATAAGAATGTTGAGATG</u>  |
| JC461  | 3'NCR of <i>RCN1</i>    | <u>AGATCCACTAGTTCTAGAGCGTACCTATCATGTTGGTTAA</u>   |
| JC462  | 3'NCR of <i>RCN1</i>    | TGTGATCTGCTCGATTTTACC                             |
| JC463  | <i>RCN1</i> overlap     | CCATTAACTATAGACGTTGCT                             |
| JC464  | <i>RCN1</i> overlap     | AACAGCACATAGAAAGATCAA                             |
| JC465  | <i>RCN1</i> ORF         | ACTCACGTCTAATGAAAGGGA                             |
| JC466  | <i>RCN1</i> ORF         | ATTTTGGTGGCAATGCCGTT                              |
| JC370  | qPCR <i>ACT1</i> ORF    | GTACCACCATGTTCCCAGGT                              |
| JC371  | qPCR <i>ACT1</i> ORF    | ACCACCGATCCAGACAGAGT                              |
| JC437  | qPCR <i>CNA1</i> ORF    | ACAGAGCGCTGTTCCCTGATT                             |
| JC438  | qPCR <i>CNA1</i> ORF    | TGGTTGGGAAGTCTGTTTT                               |
| JC439  | qPCR <i>CRZ1</i> ORF    | GGGCGATAACGAAGAGGATA                              |

|       |                      |                        |
|-------|----------------------|------------------------|
| JC440 | qPCR <i>CRZ1</i> ORF | TACATCGCCATTCATGCTGT   |
| JC431 | qPCR <i>YPS5</i> ORF | CAAGATCAGCGATGAACTAACG |
| JC432 | qPCR <i>YPS5</i> ORF | TACTTGCGCTGACAAACCAC   |
| JC435 | qPCR <i>RCN2</i> ORF | CAGTACTTACGCCGCTTC     |
| JC436 | qPCR <i>RCN2</i> ORF | CGATAACAGGGACTCCGTCA   |

---

Underline indicates sequences complementary to the *SAT1* flipper

**Table S2 Genes induced by FK506 but not by calcineurin mutation.**

| ORF          | Gene         | Fold change<br>(FK506<br>/ WT) | Functional description                                               |
|--------------|--------------|--------------------------------|----------------------------------------------------------------------|
| CAGL0M12947g |              | 10.2                           | Unknown                                                              |
| CAGL0M01760g | <i>PDR5</i>  | 9.5                            | Plasma membrane ATP-binding cassette multidrug transporter           |
| CAGL0M09713  |              | 5.3                            | Unknown                                                              |
| CAGL0F02717g | <i>PDR15</i> | 2.8                            | Plasma membrane ATP-binding cassette multidrug transporter           |
| CAGL0E06688g |              | 2.3                            | Unknown                                                              |
| CAGL0K09702g |              | 2.2                            | Unknown                                                              |
| CAGL0C03223g | <i>SDH2</i>  | 1.9                            | Iron-sulfur protein subunit of succinate dehydrogenase               |
| CAGL0M09735g | <i>MEC3</i>  | 1.9                            | Damage and meiotic pachytene checkpoint protein                      |
| CAGL0M01870g |              | 1.8                            | Unknown                                                              |
| CAGL0G00242g | <i>YOR1</i>  | 1.8                            | Plasma membrane ATP-binding cassette multidrug transporter           |
| CAGL0C03289g | <i>YBT1</i>  | 1.6                            | Bile acid transporter                                                |
| CAGL0K12958g |              | 1.4                            | Unknown                                                              |
| CAGL0B01947g | <i>INO2</i>  | 1.3                            | Heteromeric Ino2/Ino4 basic helix-loop-helix transcription activator |
| CAGL0L09603g | <i>DSN1</i>  | 1.3                            | Important for chromosome segregation                                 |
| CAGL0C04433g | <i>MCD1</i>  | 1.3                            | Required for sister chromatid cohesion in mitosis and meiosis        |
| CAGL0I04180g | <i>CUP2</i>  | 0.8                            | Copper-binding transcription factor                                  |
| CAGL0M09889g |              | 0.7                            | Unknown                                                              |
| CAGL0J08184g | <i>ALP1</i>  | 0.7                            | Arginine transporter                                                 |
| CAGL0G06358g | <i>SNC1</i>  | 0.7                            | Vesicle membrane receptor protein                                    |
| CAGL0A01089g |              | 0.6                            | Unknown                                                              |
