# Supplementary material for: Convergent Evolution of Calcineurin Pathway Roles in Thermotolerance and Virulence in Candida glabrata
Source: PubMed Central journal article supplement (PMC3362297; doi:10.1534/g3.112.002279), 2012-06-01
Supplement: supp_2.6.675_FigureS1.pdf [file supp_2.6.675_FigureS1.pdf]

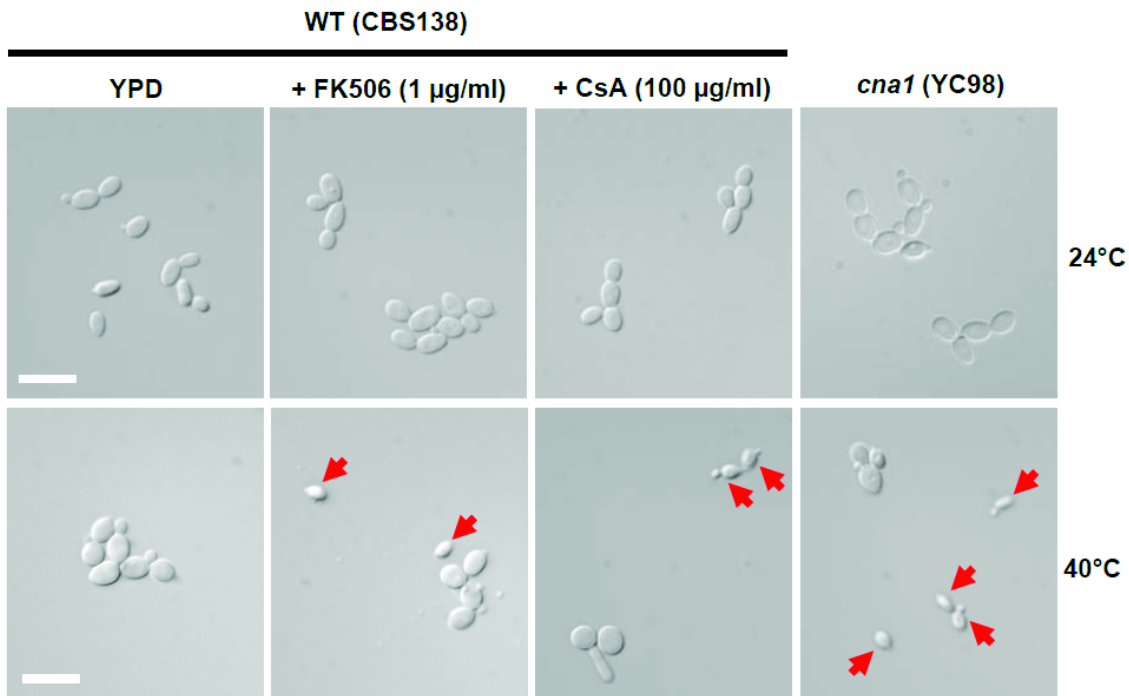

**Figure S1** *C. glabrata* wild-type cells exhibit a shrunken cell morphology at 40°C in the presence of FK506 or CsA. Cells were grown overnight in YPD medium at 24°C, washed twice with dH<sub>2</sub>O, diluted to 0.5 OD<sub>600</sub>/ml in fresh liquid YPD medium in the presence or absence of FK506 (1  $\mu\text{g/ml}$ ) or CsA (100  $\mu\text{g/ml}$ ), and incubated at 24°C or 40°C with shaking at 250 rpm for 4 h. The *cna1* mutant strain was served as the control. The shrunken cells (marked with arrowheads) were only found at high temperature (40°C), but not at 24°C. The percentage of shrunken cells at 40°C in wild-type, FK506-treated wild-type, CsA-treated wild-type, and *cna1* mutant are  $3.1 \pm 1.4\%$  (mean  $\pm$  standard deviation; from three independent experiments),  $27.1 \pm 8.3\%$ ,  $23.4 \pm 9.3\%$ , and  $42 \pm 11.3\%$ , respectively. The images were taken at 100X. Scale bar = 10  $\mu\text{m}$ .
