# Supplementary material for: Convergent Evolution of Calcineurin Pathway Roles in Thermotolerance and Virulence in Candida glabrata
Source: PubMed Central journal article supplement (PMC3362297; doi:10.1534/g3.112.002279), 2012-06-01
Supplement: supp_2.6.675_FigureS2.pdf [file supp_2.6.675_FigureS2.pdf]

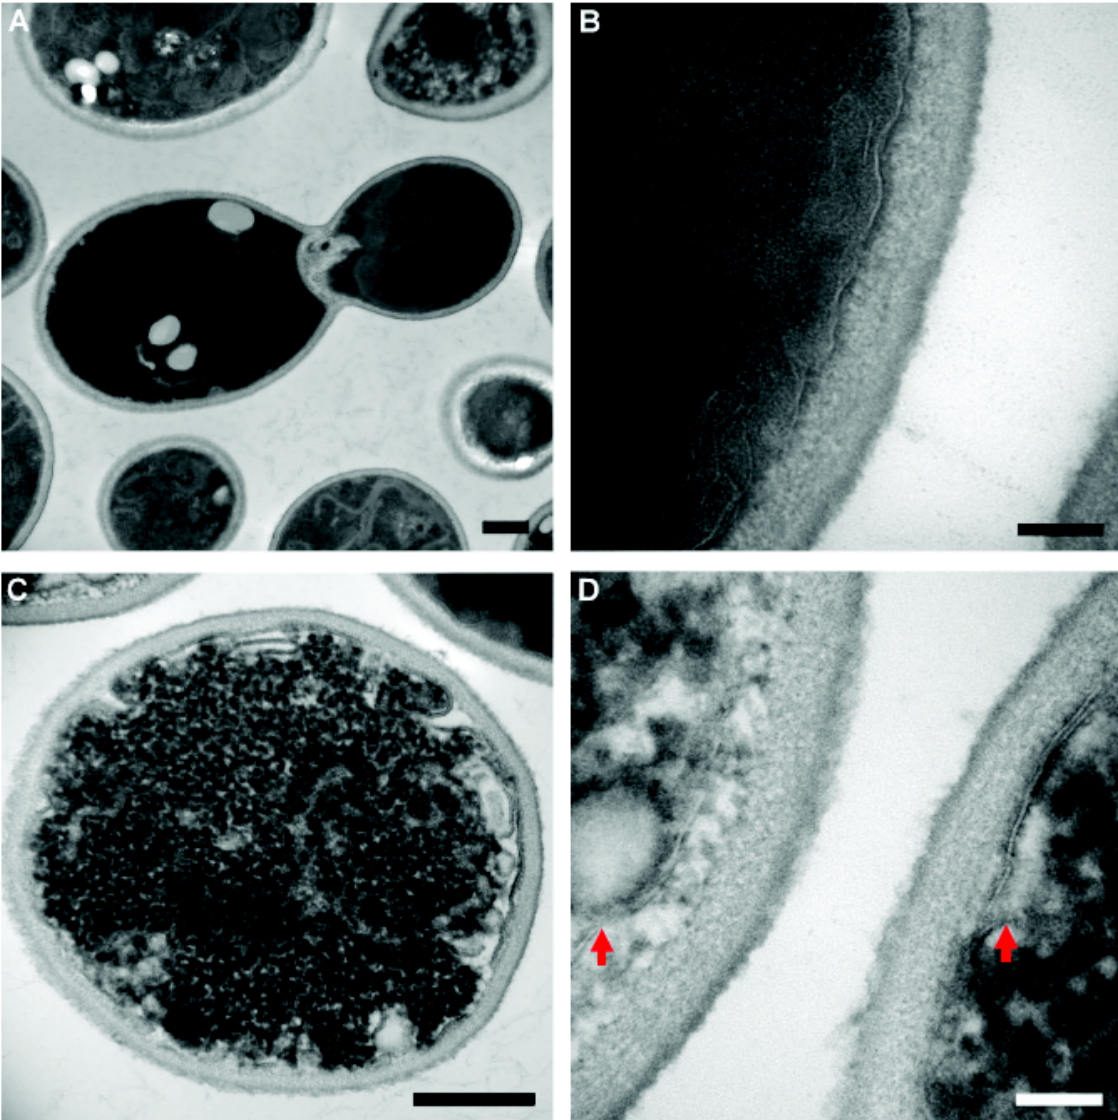

**Figure S2** TEM images of *C. glabrata* wild type (CBS138) and *crz1* mutant (YC182) cells grown at 40°C. *C. glabrata cna1* and *cnb1* could not be recovered from growth at 40°C for TEM analysis. Wild-type cells (**A, B**) display normal morphology and budding but *crz1* mutants (**C, D**) display aberrant cell membrane and morphology in comparison to wild-type cells. Scale bar = 500 nm (**A, C**) and 100 nm (**B, D**). First and second columns represent a global image of the cell and a higher magnification view of the cell membrane, respectively.
