# Supplementary material for: Convergent Evolution of Calcineurin Pathway Roles in Thermotolerance and Virulence in Candida glabrata
Source: PubMed Central journal article supplement (PMC3362297; doi:10.1534/g3.112.002279), 2012-06-01
Supplement: supp_2.6.675_FigureS3.pdf [file supp_2.6.675_FigureS3.pdf]

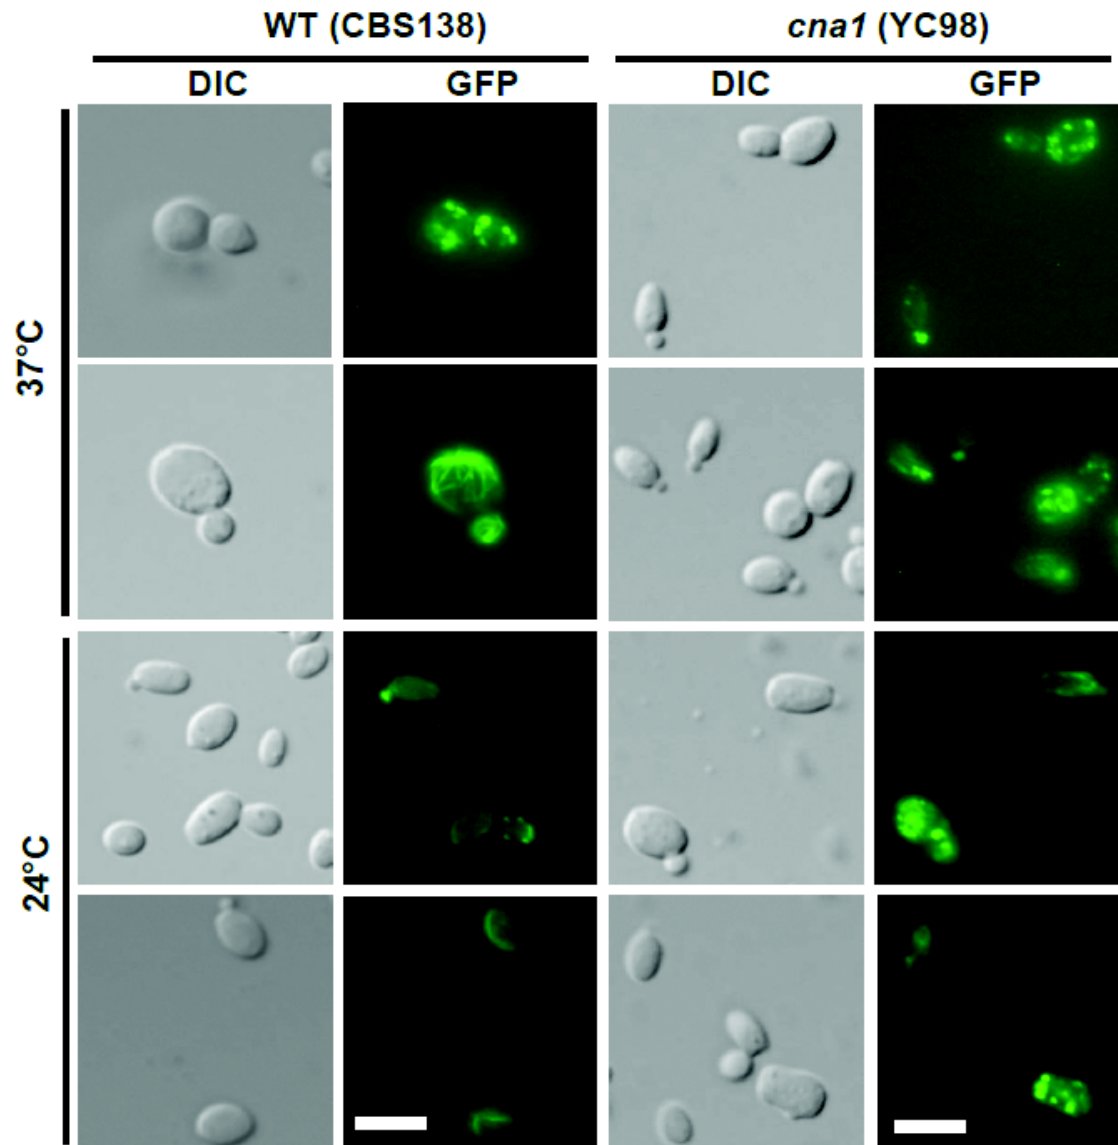

**Figure S3** *C. glabrata* wild type and calcineurin mutant cells exhibit normal cortical actin patch structures. The incubation and staining of cells with Alexa fluor® 488 phalloidin are described in material and methods. The images were taken at 100X. Scale bar = 5  $\mu$ m.
