# Supplementary material for: Convergent Evolution of Calcineurin Pathway Roles in Thermotolerance and Virulence in Candida glabrata
Source: PubMed Central journal article supplement (PMC3362297; doi:10.1534/g3.112.002279), 2012-06-01
Supplement: supp_2.6.675_FigureS5.pdf [file supp_2.6.675_FigureS5.pdf]

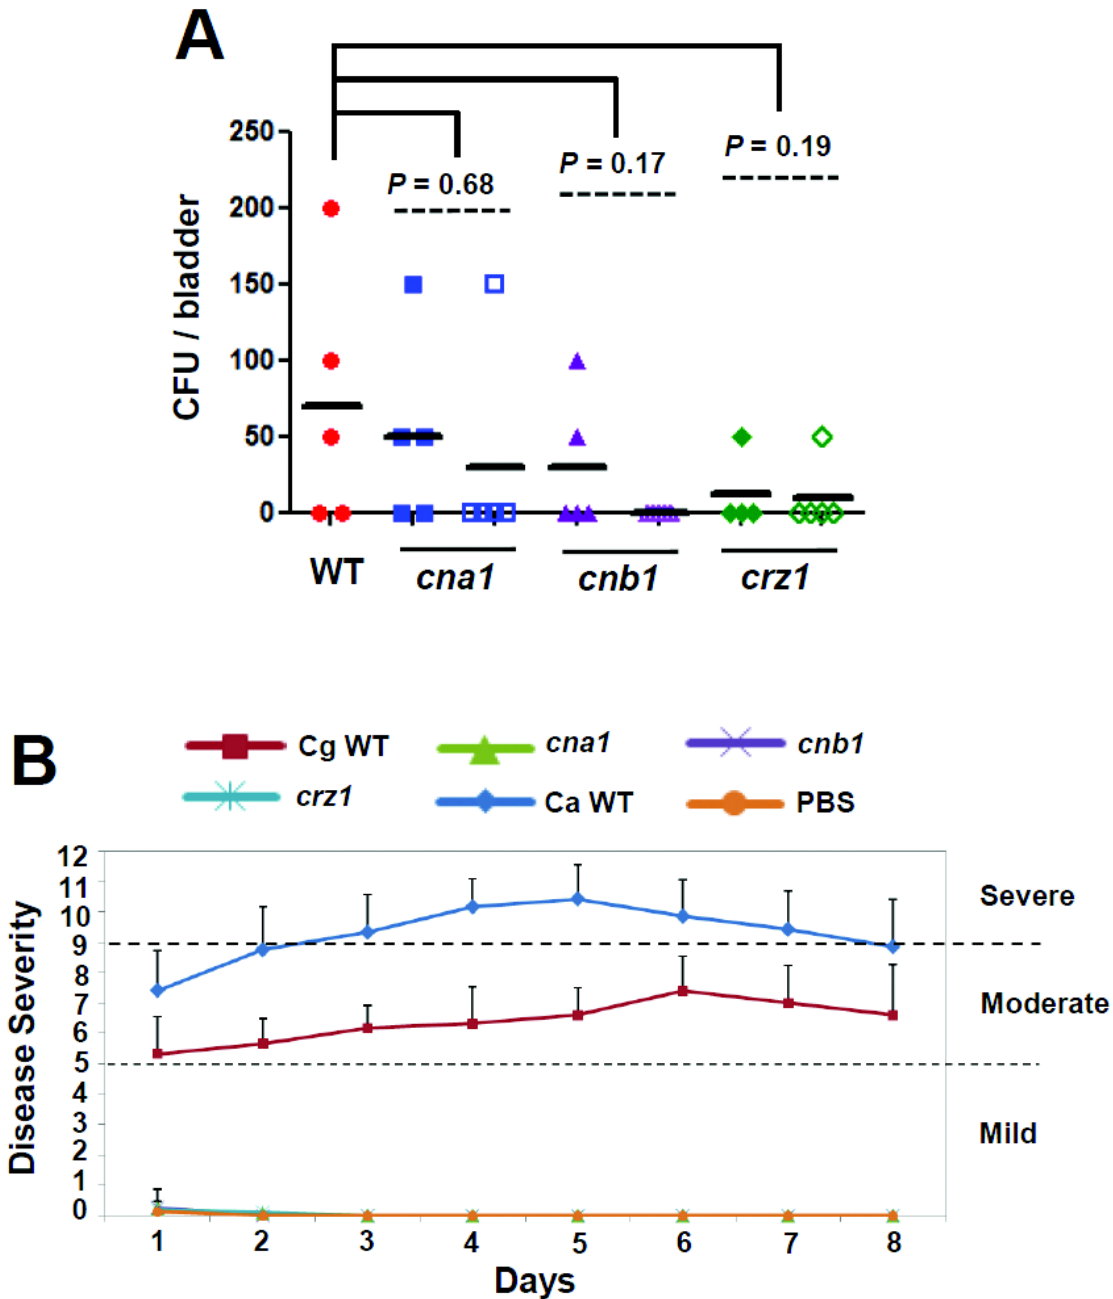

**Figure S5** Virulence of *C. glabrata* calcineurin and *crz1* mutants in murine urinary tract and ocular infection models. **(A)** The fungal burden in the bladders was determined at day 7 after challenging mice with  $3 \times 10^7$  cells via urinary tract infection. Five female C3H/HeJ mice were inoculated per strain (except one *crz1* mutant with 4 mice due to the death of one mouse following anesthesia treatment). The *P* value between wild-type (WT) and mutants is shown. **(B)** Disease severity was scored for 8 days. *C. albicans* SC5314 and the PBS mock inoculation served as reference controls. Mice infected with *C. glabrata* *cna1*, *cnb1*, or *crz1* mutants, or the PBS control, exhibited normal corneas, and score curves essentially overlapped. Mice infected with wild-type *C. glabrata* CBS138 and *C. albicans* SC5314 strains exhibiting visible signs of keratitis were plotted.
