# Supplementary material for: Convergent Evolution of Calcineurin Pathway Roles in Thermotolerance and Virulence in Candida glabrata
Source: PubMed Central journal article supplement (PMC3362297; doi:10.1534/g3.112.002279), 2012-06-01
Supplement: supp_2.6.675_TableS1.pdf [file supp_2.6.675_TableS1.pdf]

**Table S1 PCR primers**

| Primer | Use                     | Sequence (5' → 3')                                |
|--------|-------------------------|---------------------------------------------------|
| JC17   | <i>SAT1</i> flipper     | GGCCCCCCTCGAGGAAGTT                               |
| JC18   | <i>SAT1</i> flipper     | GCTCTAGAACTAGTGGATCT                              |
| JC49   | 5'NCR of <i>CNA1</i>    | ACACATTATGCAACATCAA                               |
| JC50   | 5'NCR of <i>CNA1</i>    | <u>AACTTCCTCGAGGGGGGGCCATTGTGCGGTGCCAACCAAGAA</u> |
| JC51   | 3'NCR of <i>CNA1</i>    | <u>AGATCCACTAGTTCTAGAGCTTTCATCTCAAGAGCAAAA</u>    |
| JC52   | 3'NCR of <i>CNA1</i>    | TTGAACGTTACTGGGGTTGA                              |
| JC55   | <i>CNA1</i> ORF         | AAGACAGACGCAGAGCTGAAT                             |
| JC56   | <i>CNA1</i> ORF         | GACATTCGTTTTTGAAGTGA                              |
| JC48   | Disruption confirmation | ACAATCAAAGGTGGTCCT                                |
| JC81   | Disruption confirmation | AACTTCCTCGAGGGGGGGCC                              |
| JC122  | Disruption confirmation | CACACTTTTATTGTTGTCGCC                             |
| JC134  | 5'NCR of <i>CNB1</i>    | ACACCATAAAAAGTCCCAGCG                             |
| JC135  | 5'NCR of <i>CNB1</i>    | <u>AACTTCCTCGAGGGGGGGCCCTCCCTTGATTAATACTTCTC</u>  |
| JC136  | 3'NCR of <i>CNB1</i>    | <u>AGATCCACTAGTTCTAGAGCGGCAAGAACTTAACGAGGA</u>    |
| JC137  | 3'NCR of <i>CNB1</i>    | TCAACTTCAACAGAGTAGCTC                             |
| JC138  | <i>CNB1</i> overlap     | CAAACGTTTTGTTGGATGGC                              |
| JC139  | <i>CNB1</i> overlap     | CAACACTTCGGAGAGAGAT                               |
| JC140  | <i>CNB1</i> ORF         | ATGGGAGCTGCACCATCTAAA                             |
| JC141  | <i>CNB1</i> ORF         | TACTGAAGGGTCAGGCTCTTT                             |
| JC142  | 5'NCR of <i>CRZ1</i>    | TAAACCCATGGAGTGTGGAA                              |
| JC143  | 5'NCR of <i>CRZ1</i>    | <u>AACTTCCTCGAGGGGGGGCCGCTGAATATTGCAAATCTTG</u>   |
| JC144  | 3'NCR of <i>CRZ1</i>    | <u>AGATCCACTAGTTCTAGAGCCACAAACCTCCAGTATTTTT</u>   |
| JC145  | 3'NCR of <i>CRZ1</i>    | TCAAGTCTTAGAGATTCACCA                             |
| JC146  | <i>CRZ1</i> overlap     | TAATGAAAGCAATGCCAA                                |
| JC147  | <i>CRZ1</i> overlap     | GCAACAAATTTCTTGACTGGT                             |
| JC148  | <i>CRZ1</i> ORF         | TGGGCGATAACGAAGAGGATA                             |
| JC149  | <i>CRZ1</i> ORF         | CTCAAGTTATTTGAAGATGCA                             |
| JC441  | 5'NCR of <i>RCN2</i>    | CCGTCGGGCTTCTTTAAAT                               |
| JC442  | 5'NCR of <i>RCN2</i>    | <u>AACTTCCTCGAGGGGGGGCCCTTGCTGCTATATCTGCGTG</u>   |
| JC443  | 3'NCR of <i>RCN2</i>    | <u>AGATCCACTAGTTCTAGAGCGGGGATTGCTTCTATGAAGCT</u>  |
| JC444  | 3'NCR of <i>RCN2</i>    | AAATTGCTCACGGAGTCACCT                             |
| JC445  | <i>RCN2</i> overlap     | CTCGGGATCATTGCTCAATA                              |
| JC446  | <i>RCN2</i> overlap     | AACGGGTCTAGTCGAGGACTT                             |
| JC453  | <i>RCN2</i> ORF         | AAAGGATCCATGAAGACACAGGTATTGA                      |
| JC454  | <i>RCN2</i> ORF         | AAAGGGCCCCTAGTTAAAGAACTCATCGAC                    |
| JC459  | 5'NCR of <i>RCN1</i>    | CGAGTGTATTATTTCGGG                                |
| JC460  | 5'NCR of <i>RCN1</i>    | <u>AACTTCCTCGAGGGGGGGCCCTCCGATAAGAATGTTGAGATG</u> |
| JC461  | 3'NCR of <i>RCN1</i>    | <u>AGATCCACTAGTTCTAGAGCGTACCTATCATGTTGGTTAA</u>   |
| JC462  | 3'NCR of <i>RCN1</i>    | TGTGATCTGCTCGATTTTACC                             |
| JC463  | <i>RCN1</i> overlap     | CCATTAACTATAGACGTTGCT                             |
| JC464  | <i>RCN1</i> overlap     | AACAGCACATAGAAAGATCAA                             |
| JC465  | <i>RCN1</i> ORF         | ACTCACGTCTAATGAAAGGGA                             |
| JC466  | <i>RCN1</i> ORF         | ATTTTGGTGGCAATGCCGTT                              |
| JC370  | qPCR <i>ACT1</i> ORF    | GTACCACCATGTTCCCAGGT                              |
| JC371  | qPCR <i>ACT1</i> ORF    | ACCACCGATCCAGACAGAGT                              |
| JC437  | qPCR <i>CNA1</i> ORF    | ACAGAGCGCTGTTCTGATT                               |
| JC438  | qPCR <i>CNA1</i> ORF    | TGGTTGGGAAGTCTGTTTT                               |
| JC439  | qPCR <i>CRZ1</i> ORF    | GGGCGATAACGAAGAGGATA                              |

|       |                      |                        |
|-------|----------------------|------------------------|
| JC440 | qPCR <i>CRZ1</i> ORF | TACATCGCCATTCATGCTGT   |
| JC431 | qPCR <i>YPS5</i> ORF | CAAGATCAGCGATGAACTAACG |
| JC432 | qPCR <i>YPS5</i> ORF | TACTTGCGCTGACAAACCAC   |
| JC435 | qPCR <i>RCN2</i> ORF | CAGTACTTACGCCGCTTC     |
| JC436 | qPCR <i>RCN2</i> ORF | CGATAACAGGGACTCCGTCA   |

---

Underline indicates sequences complementary to the *SAT1* flipper
