# Supplementary material for: Convergent Evolution of Calcineurin Pathway Roles in Thermotolerance and Virulence in Candida glabrata
Source: PubMed Central journal article supplement (PMC3362297; doi:10.1534/g3.112.002279), 2012-06-01
Supplement: supp_2.6.675_TableS2.pdf [file supp_2.6.675_TableS2.pdf]

**Table S2 Genes induced by FK506 but not by calcineurin mutation.**

| ORF          | Gene         | Fold change<br>(FK506<br>/ WT) | Functional description                                               |
|--------------|--------------|--------------------------------|----------------------------------------------------------------------|
| CAGL0M12947g |              | 10.2                           | Unknown                                                              |
| CAGL0M01760g | <i>PDR5</i>  | 9.5                            | Plasma membrane ATP-binding cassette multidrug transporter           |
| CAGL0M09713  |              | 5.3                            | Unknown                                                              |
| CAGL0F02717g | <i>PDR15</i> | 2.8                            | Plasma membrane ATP-binding cassette multidrug transporter           |
| CAGL0E06688g |              | 2.3                            | Unknown                                                              |
| CAGL0K09702g |              | 2.2                            | Unknown                                                              |
| CAGL0C03223g | <i>SDH2</i>  | 1.9                            | Iron-sulfur protein subunit of succinate dehydrogenase               |
| CAGL0M09735g | <i>MEC3</i>  | 1.9                            | Damage and meiotic pachytene checkpoint protein                      |
| CAGL0M01870g |              | 1.8                            | Unknown                                                              |
| CAGL0G00242g | <i>YOR1</i>  | 1.8                            | Plasma membrane ATP-binding cassette multidrug transporter           |
| CAGL0C03289g | <i>YBT1</i>  | 1.6                            | Bile acid transporter                                                |
| CAGL0K12958g |              | 1.4                            | Unknown                                                              |
| CAGL0B01947g | <i>INO2</i>  | 1.3                            | Heteromeric Ino2/Ino4 basic helix-loop-helix transcription activator |
| CAGL0L09603g | <i>DSN1</i>  | 1.3                            | Important for chromosome segregation                                 |
| CAGL0C04433g | <i>MCD1</i>  | 1.3                            | Required for sister chromatid cohesion in mitosis and meiosis        |
| CAGL0I04180g | <i>CUP2</i>  | 0.8                            | Copper-binding transcription factor                                  |
| CAGL0M09889g |              | 0.7                            | Unknown                                                              |
| CAGL0J08184g | <i>ALP1</i>  | 0.7                            | Arginine transporter                                                 |
| CAGL0G06358g | <i>SNC1</i>  | 0.7                            | Vesicle membrane receptor protein                                    |
| CAGL0A01089g |              | 0.6                            | Unknown                                                              |
